# Supplementary material for: Assessing Attitudes and Participation Regarding a Pilot COVID-19 Workplace Vaccination Program in Southern Germany Considering the Occupational Health Perspective—A Mixed Methods Study
Source: MDPI journal article supplement (doi:10.3390/vaccines11061082), 2023-06-09
Supplement: s1 [file s1]

Vaccines

*Article*

## **Assessing Attitudes and Participation Regarding a Pilot COVID-19 Workplace Vaccination Program in Southern Germany Considering the Occupational Health Perspective—A Mixed Methods Study**

Anke Wagner, Kamil Keles, Christine Preiser, Anna Neunhöffer, Jana Soeder, Juliane Schwille-Kiuntke, Monika A. Rieger and Esther Rind

### **Supplementary Materials**

#### **Content of Supplementary Materials**

- **Table S1.** Interview guide for single interviews
- **Table S2.** Category system including main categories, subcategories, and definitions

**Table S1.** Interview guide for single interviews

**Note:** Translated to English by the authors for the purpose of publication. Original version was in German only.

| Structure of the interviews                                                             | Content of the interviews                                                                                                                                                                                                                                                                                                                                                                                                                                                                                                                                                                                                                                                                                                                                                                                                                                                                                                                                                                  |
|-----------------------------------------------------------------------------------------|--------------------------------------------------------------------------------------------------------------------------------------------------------------------------------------------------------------------------------------------------------------------------------------------------------------------------------------------------------------------------------------------------------------------------------------------------------------------------------------------------------------------------------------------------------------------------------------------------------------------------------------------------------------------------------------------------------------------------------------------------------------------------------------------------------------------------------------------------------------------------------------------------------------------------------------------------------------------------------------------|
| <b>1. Introduction</b>                                                                  | <ul style="list-style-type: none"> <li>Welcome and thanks for participation</li> <li>Information about the study</li> <li>Information about the interview (aim of the interview, presumed duration, request to freely describe your impressions, no right or wrong answers)</li> <li>Brief repeated information on data protection</li> </ul>                                                                                                                                                                                                                                                                                                                                                                                                                                                                                                                                                                                                                                              |
| <b>2. Organization of the early COVID-19 workplace vaccination program</b>              | <p>Key questions</p> <ul style="list-style-type: none"> <li>How did you personally experience the start of the early COVID-19 workplace vaccination program?</li> <li>How did you organize and implement the vaccinations in your company?</li> <li>What was your personal role during the process of your company becoming part of the early COVID-19 workplace vaccination program?</li> <li>What support did you receive in planning and implementing vaccination as part of the early COVID-19 workplace vaccination program?</li> <li>How do you assess the cooperation with the Ministry of Social Affairs in the context of the early COVID-19 workplace vaccination program?</li> </ul> <p>Follow-up questions</p> <ul style="list-style-type: none"> <li>What specific support did you receive?</li> <li>What kind of support do you wish you had received?</li> <li>What would have been helpful in retrospect?</li> <li>What other support did your company receive?</li> </ul> |
| <b>3. Perceived response of employees to the early COVID-19 vaccination offer</b>       | <p>Key question</p> <ul style="list-style-type: none"> <li>How was the offer for vaccinations received by the employees in the early COVID-19 workplace vaccination program?</li> </ul> <p>Follow-up question</p> <ul style="list-style-type: none"> <li>Which employees had a particular need for information?</li> </ul>                                                                                                                                                                                                                                                                                                                                                                                                                                                                                                                                                                                                                                                                 |
| <b>4. Identified advantages and disadvantages of COVID-19 vaccinations in companies</b> | <p>Key questions</p> <ul style="list-style-type: none"> <li>What advantages can you see in occupational physicians contributing to the COVID-19 vaccination campaign in companies?</li> <li>Which disadvantages exist from your point of view?</li> </ul>                                                                                                                                                                                                                                                                                                                                                                                                                                                                                                                                                                                                                                                                                                                                  |

| Structure of the interviews                                                      | Content of the interviews                                                                                                                                                                                                                                                                                                                                                                                                                                                                                                         |
|----------------------------------------------------------------------------------|-----------------------------------------------------------------------------------------------------------------------------------------------------------------------------------------------------------------------------------------------------------------------------------------------------------------------------------------------------------------------------------------------------------------------------------------------------------------------------------------------------------------------------------|
| <b>5. General assessment of the early COVID-19 workplace vaccination program</b> | <ul style="list-style-type: none"> <li>• What benefit do you think the early COVID-19 workplace vaccination program has for workplace vaccinations outside of this?</li> </ul>                                                                                                                                                                                                                                                                                                                                                    |
| <b>6. Implications based on the early COVID-19 workplace vaccination program</b> | <p>Key questions</p> <ul style="list-style-type: none"> <li>• How has vaccinating against COVID-19 affected your everyday work?</li> <li>• Which occupational health care topics do you think have become more important and urgent during the pandemic?</li> <li>• Which work activities moved into the background?</li> <li>• What do you personally take into account for the future for the companies where you provide occupational health care?</li> <li>• What would you like to see in your future in general?</li> </ul> |
| <b>7. Final question and conclusion</b>                                          | <ul style="list-style-type: none"> <li>• Are there any aspects that have not been mentioned but that you would like to address?</li> <li>• Thank you for participating in the interview.</li> </ul>                                                                                                                                                                                                                                                                                                                               |

**Table S2.** Category system including main categories, subcategories and definitions

**Note:** Translated to English by the authors for the purpose of publication. Original version was in German only.

| Main categories                                                                 | Subcategories                                                              | Definition                                                                                                                                                                                                                                                                                                           |
|---------------------------------------------------------------------------------|----------------------------------------------------------------------------|----------------------------------------------------------------------------------------------------------------------------------------------------------------------------------------------------------------------------------------------------------------------------------------------------------------------|
| Vaccination during the early COVID-19 workplace vaccination program             | Experiencing the start of the early COVID-19 workplace vaccination program | All statements that refer to the start of the early COVID-19 workplace vaccination program and how the interviewees perceived it.                                                                                                                                                                                    |
|                                                                                 | Preparation of the COVID-19 vaccinations                                   | All statements relating to the preparation of COVID-19 vaccination as part of the early COVID-19 workplace vaccination program, be it organizing facilities, scheduling appointments, information campaigns, handling the COVID-19 vaccines (transport and storage), and prioritization of persons to be vaccinated. |
|                                                                                 | Carrying out the COVID-19 vaccinations                                     | All statements that refer to the implementation of COVID-19 vaccinations as part of the early COVID-19 workplace vaccination program and related activities that were carried out in advance and afterwards.                                                                                                         |
| Support and cooperation during the early COVID-19 workplace vaccination program | Support and cooperation                                                    | All statements related to support and cooperation: internal support, external support, as well as cooperation with vaccination centers and Ministry of Social Affairs, Health and Integration.                                                                                                                       |
|                                                                                 | Need for support                                                           | All statements regarding possible support needs during the early COVID-19 workplace vaccination program.                                                                                                                                                                                                             |
| Perceived response of employees to the early COVID-19 vaccination offer         | Positive response                                                          | All statements referring to a positive response to COVID-19 vaccination in the context of the early COVID-19 workplace vaccination program.                                                                                                                                                                          |
|                                                                                 | Negative response                                                          | All statements referring to a negative response to COVID-19 vaccination in the context of the early COVID-19 workplace vaccination program.                                                                                                                                                                          |
| Change in everyday working life                                                 | Workload                                                                   | All statements on workload during the early COVID-19 workplace vaccination program and the period afterwards.                                                                                                                                                                                                        |
|                                                                                 | Occupational health issues                                                 | All statements on special occupational health issues that are suddenly more the                                                                                                                                                                                                                                      |

|                                                                               |                                                  |                                                                                                                                                                      |
|-------------------------------------------------------------------------------|--------------------------------------------------|----------------------------------------------------------------------------------------------------------------------------------------------------------------------|
|                                                                               |                                                  | focus of an occupational physician's activities.                                                                                                                     |
|                                                                               | Occupational health and safety measures          | All statements on special occupational health and safety measures implemented in the company.                                                                        |
| Identified advantages and disadvantages of COVID-19 vaccinations in companies | Advantages                                       | All statements dealing with the advantages of vaccination against COVID-19 through occupational physicians.                                                          |
|                                                                               | Disadvantages                                    | All statements dealing with the disadvantages of vaccination against COVID-19 through occupational physicians.                                                       |
| General assessment of the early COVID-19 workplace vaccination program        | The early COVID-19 workplace vaccination program | All statements that refer to a general assessment of the early COVID-19 workplace vaccination program, both critical attitudes and positive attitudes, are included. |
|                                                                               | Implications and wishes                          | All statements that include implications that have resulted from the COVID-19 vaccinations in workplaces or overriding wishes for the future.                        |
